# Supplementary material for: Understanding the effect of polypyrrole and poly(3,4-ethylenedioxythiophene) on enhancing the supercapacitor performance of NiCo2O4electrodes
Source: Royal Society of Chemistry journal article supplement (doi:10.1039/c4ta03344b), 2014-08-18
Supplement: c4ta03344b1.pdf [file c4ta03344b1.pdf]

# **Understanding the Effect of Polypyrrole and Poly(3,4-ethylenedioxythiophene) on Enhancing the Supercapacitor Performance of NiCo<sub>2</sub>O<sub>4</sub> Electrode**

*Kaibing Xu<sup>a</sup>, Xiaojuan Huang<sup>a</sup>, Qian Liu<sup>a</sup>, Rujia Zou<sup>a,c</sup>, Wenyao Li<sup>a,d</sup>, Xijian Liu<sup>a,d</sup>, Shijie Li<sup>e</sup>, Jianmao Yang<sup>a,b</sup>, \* Junqing Hu<sup>a\*</sup>*

*<sup>a</sup> State Key Laboratory for Modification of Chemical Fibers and Polymer Materials, College of Materials Science and Engineering, Donghua University, Shanghai 201620, China.*

*<sup>b</sup> Research Center for Analysis and Measurement, Donghua University, Shanghai, 201620, China.*

*<sup>c</sup> Center of Super-Diamond and Advanced Films (COSDAF), Department of Physics and Materials Science, City University of Hong Kong, Hong Kong.*

*<sup>d</sup> School of Material Engineering, Shanghai University of Engineering Science, Shanghai 201620, China.*

*<sup>e</sup> College of Environmental Science and Engineering, Donghua University, Shanghai 201620, China.*



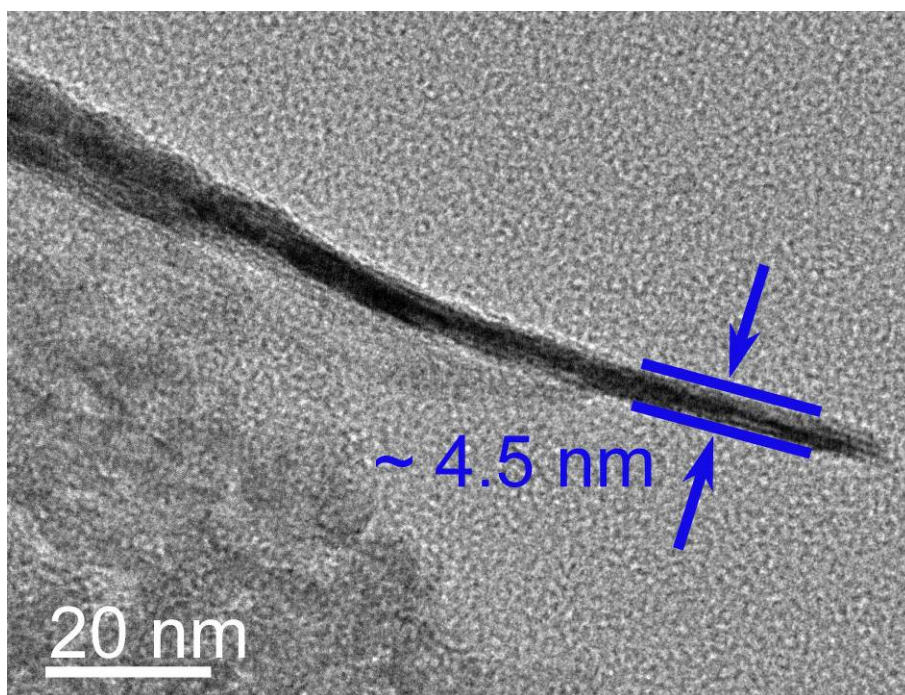

**Figure S3.** TEM image of the NiCo<sub>2</sub>O<sub>4</sub> ultrathin nanosheet.

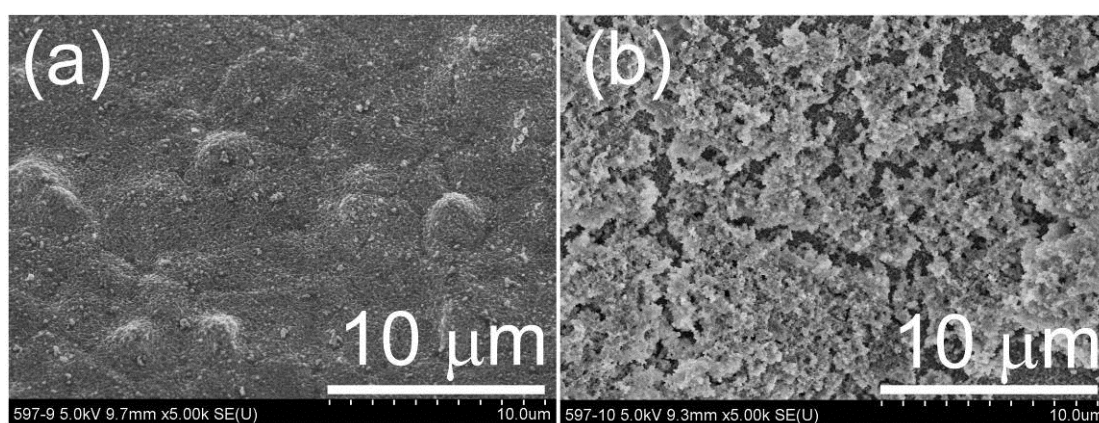

**Figure S4.** SEM image of (a) PEDOT and (b) PPy directly grown on the Ni foam

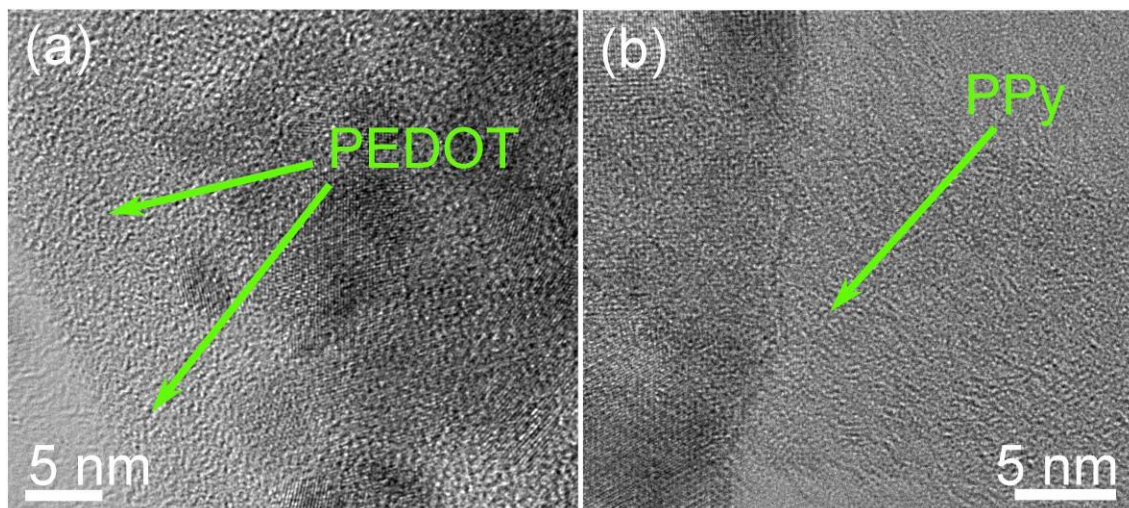

**Figure S5.** TEM image of (a)  $\text{NiCo}_2\text{O}_4@\text{PEDOT}$  and (b)  $\text{NiCo}_2\text{O}_4@\text{PPy}$  hybrid composites, showing that the PEDOT and PPy layer is amorphous.

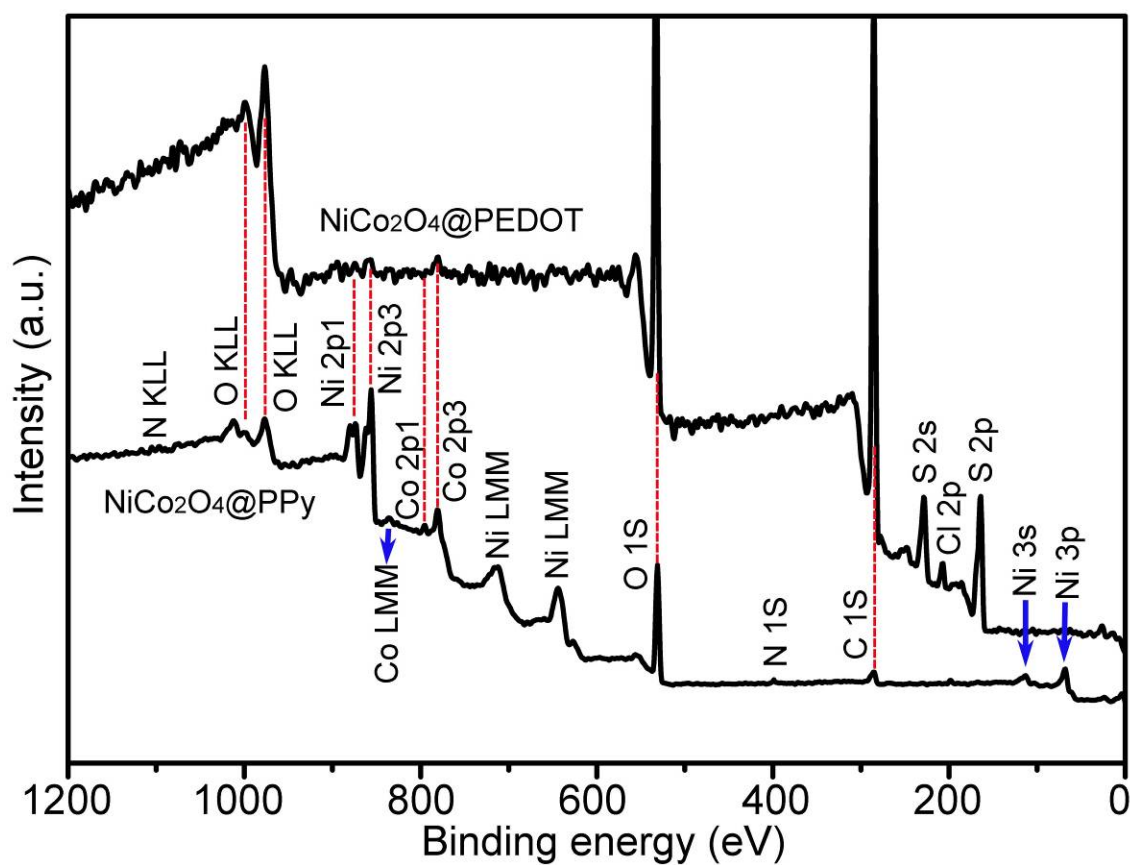

**Figure S6.** XPS survey spectra of  $\text{NiCo}_2\text{O}_4@\text{PPy}$  and  $\text{NiCo}_2\text{O}_4@\text{PEDOT}$  hybrid composites.



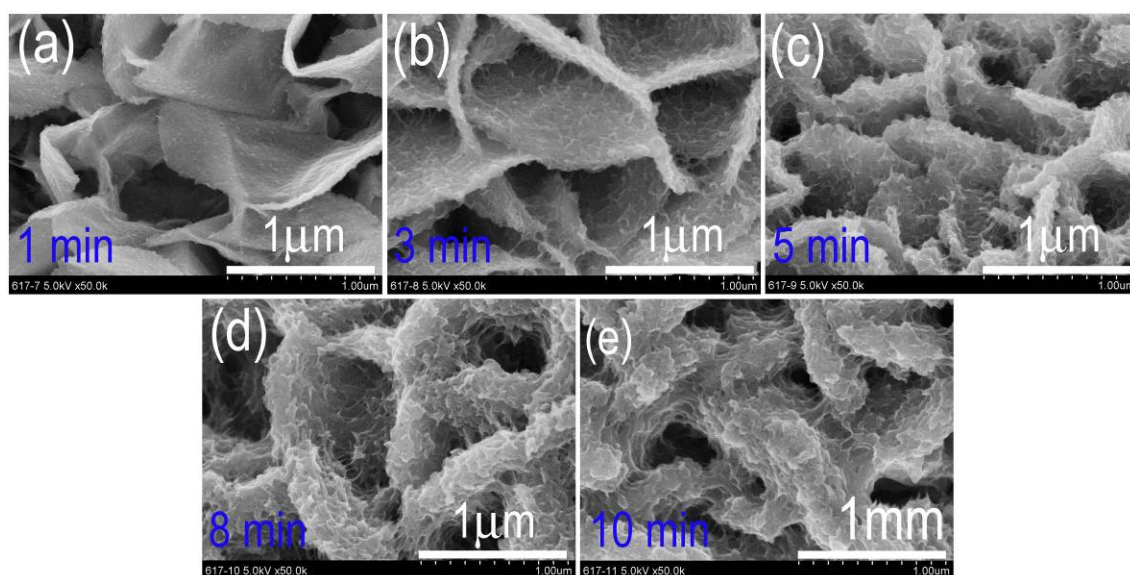

**Figure S7.** SEM images of the morphology evolution of  $\text{NiCo}_2\text{O}_4@\text{PEDOT}$  hybrid composites at different deposition time.

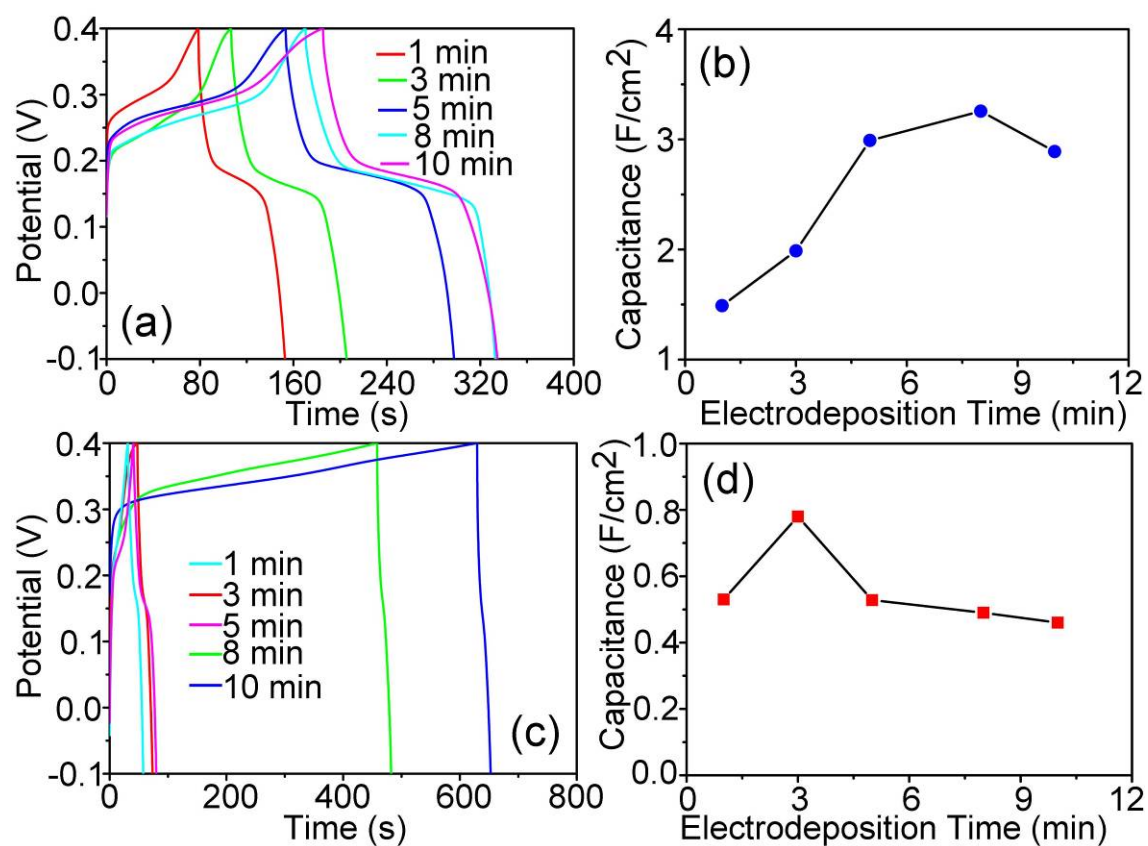

**Figure S8.** (a) CD curves and (b) areal capacitance of the  $\text{NiCo}_2\text{O}_4@\text{PPy}$  electrode as a function of the PPy electrodeposition time. (c) CD curves and (d) areal capacitance

of the  $\text{NiCo}_2\text{O}_4@\text{PEDOT}$  electrode as a function of the PEDOT electrodeposition time.

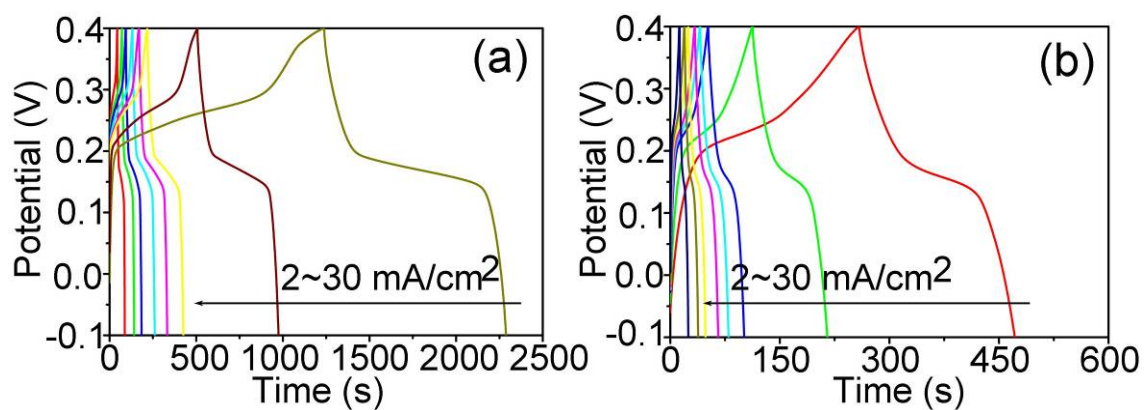

**Figure S9.** (a,b)CD curves of the  $\text{NiCo}_2\text{O}_4@\text{PPy}$  and  $\text{NiCo}_2\text{O}_4@\text{PEDOT}$  electrode at different current densities, respectively.

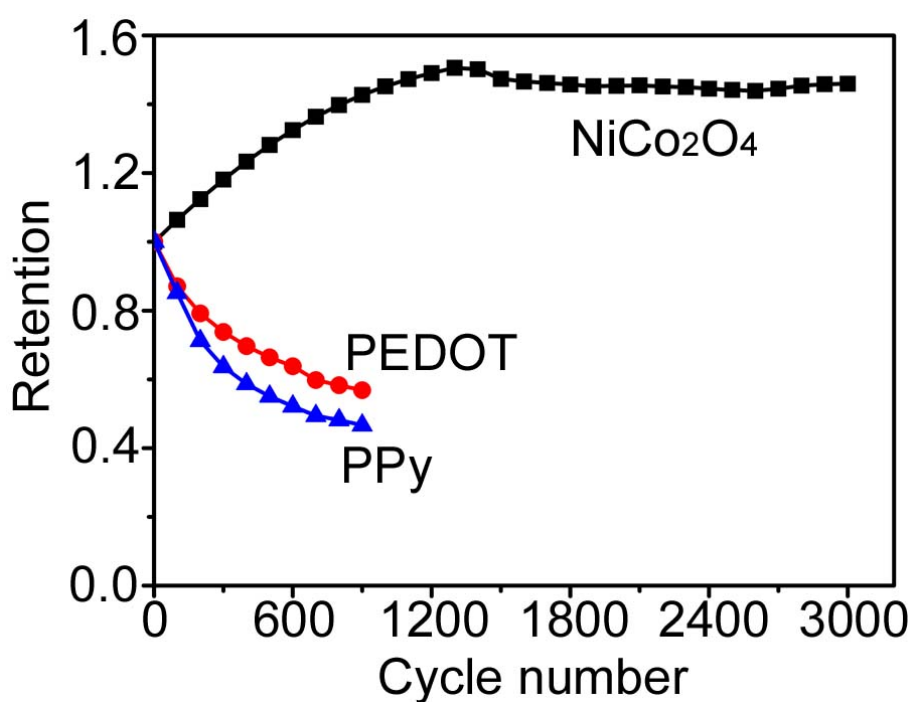

**Figure S10.** Cycling performance of pure  $\text{NiCo}_2\text{O}_4$ , PEDOT and PPy electrodes.
